# Supplementary material
Source: publisher site journal article supplement (https://www.dovepress.com/article/368840)
Supplement: Supplementary file 1 [file get_supplementary_file.php]

## Appendices. Supplementary data

**Table A.1** Proposed national price per patient per ACLR procedure in all five regions of Indonesia (US\$)

| Region                                                                                       | Hospital  | ACLR with meniscus repair | ACLR without meniscus repair | Previous national price (with and without meniscus repair) |
|----------------------------------------------------------------------------------------------|-----------|---------------------------|------------------------------|------------------------------------------------------------|
| Region 1                                                                                     | Public A  | \$ 3,674                  | \$ 2,713                     | \$ 1,451                                                   |
|                                                                                              | Private A | \$ 3,784                  | \$ 2,794                     | \$ 1,495                                                   |
|                                                                                              | Public B  | \$ 2,651                  | \$ 1,957                     | \$ 1,047                                                   |
|                                                                                              | Private B | \$ 2,730                  | \$ 2,016                     | \$ 1,078                                                   |
|                                                                                              | Public C  | \$ 1,967                  | \$ 1,452                     | \$ 777                                                     |
|                                                                                              | Private C | \$ 2,026                  | \$ 1,496                     | \$ 800                                                     |
|                                                                                              | Public D  | \$ 1,716                  | \$ 1,267                     | \$ 678                                                     |
|                                                                                              | Private D | \$ 1,767                  | \$ 1,305                     | \$ 698                                                     |
| Region 2                                                                                     | Public A  | \$ 3,707                  | \$ 2,737                     | \$ 1,464                                                   |
|                                                                                              | Private A | \$ 3,818                  | \$ 2,820                     | \$ 1,508                                                   |
|                                                                                              | Public B  | \$ 2,674                  | \$ 1,975                     | \$ 1,056                                                   |
|                                                                                              | Private B | \$ 2,755                  | \$ 2,034                     | \$ 1,088                                                   |
|                                                                                              | Public C  | \$ 1,984                  | \$ 1,465                     | \$ 784                                                     |
|                                                                                              | Private C | \$ 2,044                  | \$ 1,509                     | \$ 807                                                     |
|                                                                                              | Public D  | \$ 1,731                  | \$ 1,278                     | \$ 684                                                     |
|                                                                                              | Private D | \$ 1,783                  | \$ 1,317                     | \$ 704                                                     |
| Region 3                                                                                     | Public A  | \$ 3,718                  | \$ 2,746                     | \$ 1,468                                                   |
|                                                                                              | Private A | \$ 3,830                  | \$ 2,828                     | \$ 1,513                                                   |
|                                                                                              | Public B  | \$ 2,682                  | \$ 1,981                     | \$ 1,059                                                   |
|                                                                                              | Private B | \$ 2,763                  | \$ 2,040                     | \$ 1,091                                                   |
|                                                                                              | Public C  | \$ 1,990                  | \$ 1,070                     | \$ 786                                                     |
|                                                                                              | Private C | \$ 2,050                  | \$ 1,102                     | \$ 810                                                     |
|                                                                                              | Public D  | \$ 1,736                  | \$ 1,282                     | \$ 686                                                     |
|                                                                                              | Private D | \$ 1,788                  | \$ 1,321                     | \$ 706                                                     |
| Region 4                                                                                     | Public A  | \$ 3,773                  | \$ 2,786                     | \$ 1,490                                                   |
|                                                                                              | Private A | \$ 3,886                  | \$ 2,870                     | \$ 1,535                                                   |
|                                                                                              | Public B  | \$ 2,722                  | \$ 2,010                     | \$ 1,075                                                   |
|                                                                                              | Private B | \$ 2,804                  | \$ 2,070                     | \$ 1,107                                                   |
|                                                                                              | Public C  | \$ 2,020                  | \$ 1,491                     | \$ 798                                                     |
|                                                                                              | Private C | \$ 2,080                  | \$ 1,536                     | \$ 822                                                     |
|                                                                                              | Public D  | \$ 1,762                  | \$ 1,301                     | \$ 696                                                     |
|                                                                                              | Private D | \$ 1,815                  | \$ 1,340                     | \$ 717                                                     |
| Region 5                                                                                     | Public A  | \$ 3,894                  | \$ 2,876                     | \$ 1,538                                                   |
|                                                                                              | Private A | \$ 4,011                  | \$ 2,962                     | \$ 1,584                                                   |
|                                                                                              | Public B  | \$ 2,810                  | \$ 2,075                     | \$ 1,110                                                   |
|                                                                                              | Private B | \$ 2,894                  | \$ 2,137                     | \$ 1,143                                                   |
|                                                                                              | Public C  | \$ 2,084                  | \$ 1,539                     | \$ 823                                                     |
|                                                                                              | Private C | \$ 2,147                  | \$ 1,585                     | \$ 848                                                     |
|                                                                                              | Public D  | \$ 1,819                  | \$ 1,343                     | \$ 718                                                     |
|                                                                                              | Private D | \$ 1,873                  | \$ 1,383                     | \$ 740                                                     |
| Abbreviations: \$, The United States dollar; ACLR, anterior cruciate ligament reconstruction |           |                           |                              |                                                            |
